# Supplementary material for: PrimerHunter: a primer design tool for PCR-based virus subtype identification
Source: PubMed Central journal article supplement — Nucleic Acids Res. 2009 Mar 5;37(8):2483–92. doi: 10.1093/nar/gkp073 (PMC2677861; doi:10.1093/nar/gkp073), 2009-03-05
Supplement: gkp073_1.pdf [file gkp073_1.pdf]

| Subtype | Targets | Non Targets | PD   | FP  | RP  | Pairs |
|---------|---------|-------------|------|-----|-----|-------|
| N1      | 110     | 578         | 8.8  | 97  | 71  | 553   |
| N2      | 241     | 447         | 11.7 | 77  | 44  | 234   |
| N3      | 65      | 623         | 8.8  | 45  | 61  | 113   |
| N4      | 15      | 673         | 7.1  | 370 | 360 | 9665  |
| N5      | 32      | 656         | 6.4  | 355 | 353 | 8380  |
| N6      | 77      | 611         | 10.3 | 29  | 43  | 7     |
| N7      | 22      | 666         | 7.23 | 97  | 103 | 480   |
| N8      | 84      | 604         | 6.7  | 140 | 211 | 1785  |
| N9      | 42      | 646         | 6.6  | 292 | 305 | 6310  |

Table 5  
Primers found by PrimerHunter for each subtype of Avian influenza NA. (PD: Percentage of Dis-  
similarity; FP: Forward Primers; RP: Reverse Primers)

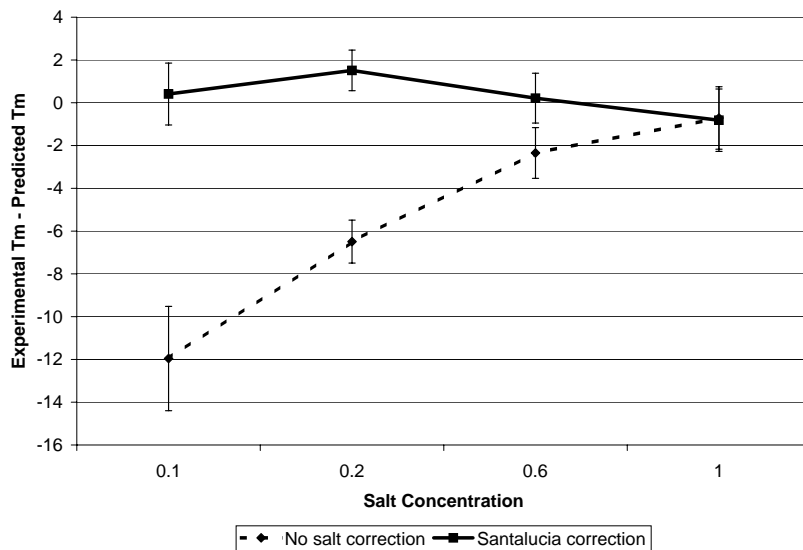

Fig. 6. Average and standard deviation of the difference (in degrees Celsius) between experimental melting temperatures and predictions obtained by fractional programming without salt correction and with salt corrections performed using the SantaLucia model for 376 duplexes of perfectly complementary oligonucleotides with lengths between 20 and 25 base pairs, GC content between 25% and 75%

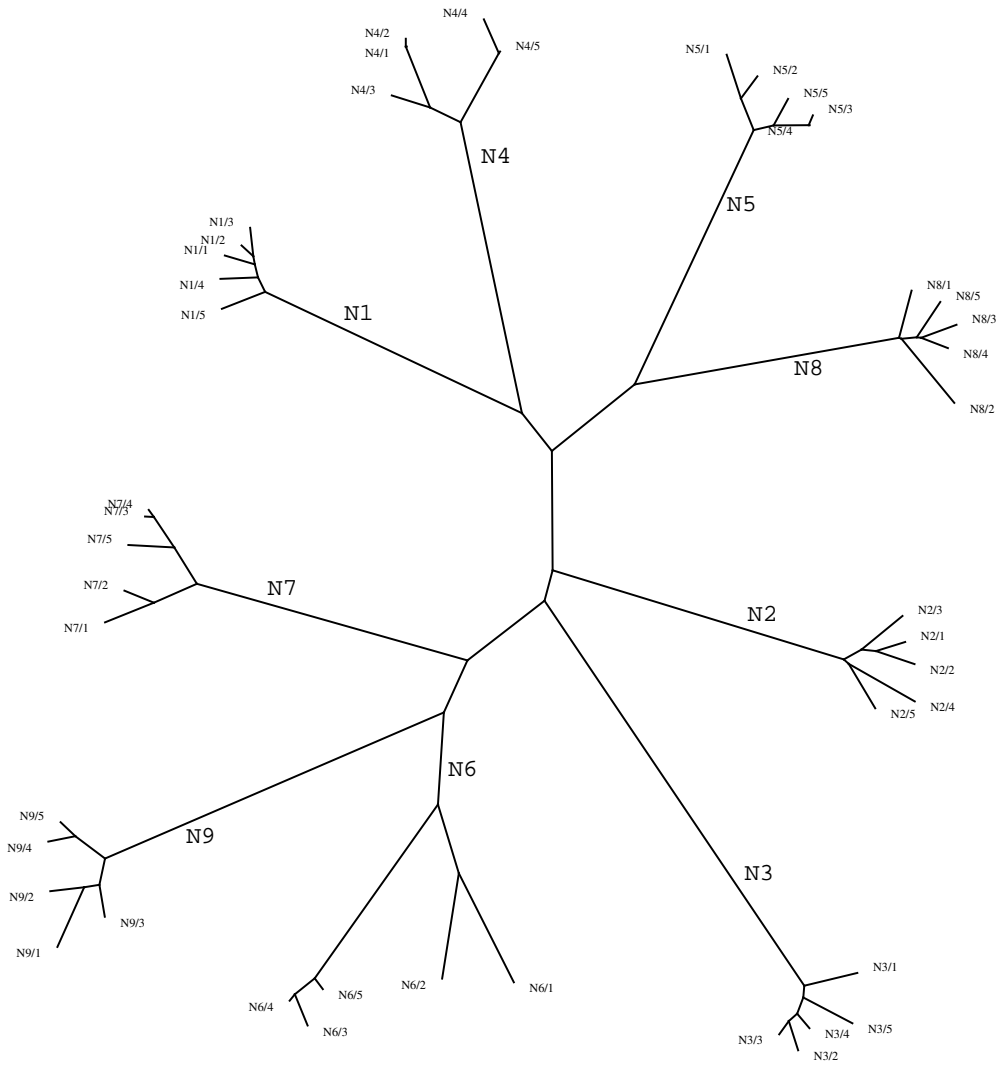

Fig. 7. Phylogenetic tree of avian influenza NA sequences of North American origin from the NCBI flu database (5 complete sequences selected at random for each subtype).
